# Supplementary material for: Synthesis and comparative study of the structural and optical properties of binary ZnO-based composites for environmental applications
Source: PubMed Central journal article supplement — RSC Adv. 2023 Feb 21;13(9):6287–303. doi: 10.1039/d2ra07837f (PMC9942456; doi:10.1039/d2ra07837f), 2023-02-21
Supplement: RA-013-D2RA07837F-s001.pdf [file RA-013-D2RA07837F-s001.pdf]

**Crystallite size of ZnO/MO composites**

| <b>Nano-composite</b>                  | <b>phase</b>                       | <b>2 <math>\theta</math><br/>(<math>^{\circ}</math>)</b> | <b><math>\beta</math> (<math>^{\circ}</math>)</b> | <b>D (nm)</b> | <b>D<sub>moy</sub><br/>(nm)</b> |
|----------------------------------------|------------------------------------|----------------------------------------------------------|---------------------------------------------------|---------------|---------------------------------|
| <b>ZnO/Mn<sub>3</sub>O<sub>4</sub></b> | <b>ZnO</b>                         | 31.6                                                     | 0.39987                                           | 20.6472748    | 18.9391                         |
|                                        |                                    | 34.4                                                     | 0.40125                                           | 20.7257402    |                                 |
|                                        |                                    | 36.2                                                     | 0.54116                                           | 15.4443643    |                                 |
|                                        | <b>Mn<sub>3</sub>O<sub>4</sub></b> | 29.1                                                     | 0.56979                                           | 14.4044544    | 13.1409                         |
|                                        |                                    | 32.8                                                     | 0.6113                                            | 13.5468982    |                                 |
|                                        |                                    | 58.7                                                     | 0.7945                                            | 11.471575     |                                 |
| <b>ZnO/Fe<sub>3</sub>O<sub>4</sub></b> | <b>ZnO</b>                         | 31.6                                                     | 0.47029                                           | 17.5556057    | 21.529                          |
|                                        |                                    | 34.4                                                     | 0.39125                                           | 21.2554715    |                                 |
|                                        |                                    | 36.2                                                     | 0.32424                                           | 25.7768079    |                                 |
|                                        | <b>Fe<sub>3</sub>O<sub>4</sub></b> | 29.8                                                     | 0.4342                                            | 18.932983     | 17.2027                         |
|                                        |                                    | 35.01                                                    | 0.5078                                            | 16.4041899    |                                 |
|                                        |                                    | 62.1                                                     | 0.5699                                            | 16.2711681    |                                 |
| <b>ZnO/CuO</b>                         | <b>ZnO</b>                         | 31.6                                                     | 0.6779                                            | 12.17912      | 16.8256                         |
|                                        |                                    | 34.4                                                     | 0.6272                                            | 13.25925      |                                 |
|                                        |                                    | 36.2                                                     | 0.3338                                            | 25.03856      |                                 |
|                                        | <b>CuO</b>                         | 35.6                                                     | 0.6106                                            | 13.66476      | 13.1593                         |
|                                        |                                    | 38.7                                                     | 0.6654                                            | 12.65390      |                                 |
| <b>ZnO/NiO</b>                         | <b>ZnO</b>                         | 31.6                                                     | 1.0461                                            | 7.892386      | 10.6315                         |
|                                        |                                    | 34.4                                                     | 1.0224                                            | 8.134001      |                                 |
|                                        |                                    | 36.2                                                     | 0.5267                                            | 15.86837      |                                 |
|                                        | <b>NiO</b>                         | 37.2                                                     | 0.5397                                            | 15.53103      | 13.0316                         |
|                                        |                                    | 43.2                                                     | 0.737                                             | 11.59335      |                                 |
|                                        |                                    | 62.7                                                     | 0.7771                                            | 11.97064      |                                 |
